# Supplementary material
Source: publisher figshare collection journal article supplement (https://tandf.figshare.com/articles/dataset/_/6220322)
Supplement: Supplementary file 3 [file 1]

Archive with 6 entries (6 files):
- Estimations.xlsx
- JASA_ACS_author_form.pdf
- Scenarios.xlsx
- Supplementary_materials_3.pdf
- Supplementary_materials_3_blind.pdf
- codes_revised_3.zip
