# Supplementary material
Source: publisher figshare collection journal article supplement (https://tandf.figshare.com/articles/dataset/_/6220322)
Supplement: Supplementary file 3 [file 1 › Estimations.xlsx]

## Sheet: Estimations
	Jolly Seber									Robust Design , Mh											Closed Population , Mh
PSP	Ni	CV.Ni	phi	CV.phi	Bi	CV.Bi	pi	CV.pi		Ni	CV.Ni	phi	CV.phi	Bi	CV.Bi	pi	CV.pi		Ni	CV.Ni	pi	CV.pi
1			0.810269	0.0258377						386.889	0.269017	0.964326	0.0597999	64.9719	0.62429	0.255972	0.21998		386.667	0.269017	0.256034	0.248164
2	314.534	0.262587	0.543014	0.146211	20.109	5.34474	0.473717	0.271968		438.059	0.168507	0.554262	0.121978	84.3372	0.898966	0.324002	0.164117		671.587	0.22398	0.221863	0.200029
3	274.966	0.179476	0.7421	0.115759	261.726	0.376052	0.520064	0.186313		327.137	0.138298	0.768026	0.111917	235.622	0.288203	0.418431	0.132826		460.881	0.205879	0.310276	0.179066
4	411.037	0.205405	0.688615	0.142976	60.2681	3.45734	0.328438	0.21678		486.872	0.156694	0.632425	0.121169	36.9817	1.88592	0.266161	0.157927		708.266	0.260654	0.190606	0.232093
5	365.299	0.164748	0.804373	0.0874933	153.063	0.454199	0.276486	0.18289		344.892	0.137083	0.835138	0.0894061	127.697	0.429634	0.299331	0.147211		290.907	0.259489	0.34719	0.230765
6	404.613	0.170634	0.655627	0.136001	0	3.82008	0.316352	0.185375		415.729	0.134093	0.641538	0.116337	44.8523	1.34194	0.30528	0.142092		445.764	0.236493	0.287148	0.21524
7	317.467	0.145425	0.8965	0.0817431	283.925	0.376519	0.321293	0.161592		311.558	0.128026	0.86925	0.083256	186.095	0.336956	0.330191	0.135127		290.081	0.265727	0.351626	0.238054
8	492.065	0.184412	0.783941	0.122241	0	1.97951	0.231676	0.199649		456.917	0.149816	0.766029	0.112034	32.9098	1.45755	0.255231	0.155561		374.94	0.274046	0.304048	0.247866
9	415.841	0.173383	0.698531	0.139471	65.5158	1.19584	0.240477	0.188828		382.921	0.140674	0.704041	0.11976	100.281	0.590311	0.2693	0.149579		299.832	0.268777	0.33352	0.241935
10	391.51	0.154461	0.693973	0.127506	80.8749	1.05892	0.280963	0.168429		369.874	0.125606	0.705463	0.108853	88.1007	0.630911	0.30348	0.130804		311.144	0.242112	0.353534	0.220935
11	354.357	0.147021	0.706612	0.114597	81.0619	1.18294	0.290667	0.164682		349.033	0.123406	0.699213	0.100448	71.935	0.756251	0.2969	0.1312		332.125	0.249402	0.310125	0.22703
12	326.976	0.132717	0.835359	0.0926939	139.255	0.502022	0.315008	0.143315		315.983	0.116352	0.841714	0.0873057	100.864	0.434361	0.331277	0.118091		279.803	0.226505	0.368116	0.202004
13	370.3	0.139829	0.912212	0.0745941	136.693	0.655791	0.297057	0.160641		366.832	0.120036	0.894094	0.0722605	100.133	0.491365	0.301117	0.12715		355.442	0.241999	0.309474	0.20972
14	446.026	0.155794	0.825657	0.0931644	102.367	0.721804	0.239896	0.175355		428.115	0.129676	0.829217	0.0935417	142.036	0.475656	0.253977	0.146118		368.293	0.279794	0.29053	0.262787
15	509.237	0.155494	0.873185	0.0968207	43.8738	1.89999	0.243501	0.171118		497.036	0.127854	0.755086	0.102881	3.49383	2.63099	0.251404	0.137556		464.873	0.248464	0.26674	0.226455
16	464.329	0.1542	0.748549	0.0900832	160.023	0.557035	0.243362	0.166894		378.799	0.121845	0.872153	0.073557	256.345	0.400095	0.317005	0.132243		248.107	0.220253	0.45545	0.197501
17	565.468	0.279375	0.748709	0.234099	370.159	1.77127	0.148549	0.288743		586.716	0.211218	0.647502	0.19858	221.406	0.856282	0.141974	0.218513		685.548	0.483431	0.12253	0.476715
18	793.44	0.280477	0.932018	0.0999794	224.069	0.742905	0.0718391	0.302967		601.305	0.212899	0.987999	0.0761844	157.024	0.727038	0.100703	0.224058		292.199	0.368267	0.195073	0.335425
19	818.125	0.285488	0.775554	0.200061	0	3.14712	0.0941176	0.293106		751.113	0.220165	0.715272	0.172886	0	2.37064	0.104248	0.223345		559.615	0.489412	0.137595	0.514194
20	533.193	0.255325	0.691202	0.165104	177.583	0.982873	0.0937746	0.270144		440.398	0.201006	0.757921	0.137398	242.648	0.70346	0.120244	0.209625		212.391	0.413051	0.235415	0.420384
21	591.103	0.237381	1	0.0547906	150.3	0.875557	0.120114	0.26412		576.435	0.190417	1	0.0637229	0	1.15362	0.123928	0.208012		507.929	0.541851	0.139783	0.561362
22	558.871	0.256266	0.901091	0.119985	271.259	0.824068	0.134199	0.272149		555.639	0.197468	0.931901	0.0976748	360.32	0.604834	0.135178	0.203401		545.189	0.378298	0.137567	0.384899
23	830.13	0.330529	0.878562	0.193467	126.102	2.0303	0.0807103	0.332701		878.121	0.231485	0.800678	0.135664	68.0047	1.36296	0.0754843	0.232279		1059.89	0.372455	0.0632143	0.371037
24	874.125	0.3422	0.683021	0.224243	0	2.47677	0.0617761	0.358071		771.096	0.238201	0.684567	0.19247	0	2.13649	0.0718456	0.258258		499.912	0.497988	0.108019	0.508496
25	550.612	0.223832	0.720349	0.171694	438.341	0.844278	0.103521	0.245451		496.526	0.185716	0.717547	0.146764	330.22	0.551931	0.118141	0.195873		299.858	0.510723	0.19009	0.545435
26	814.42	0.229322	0.951877	0.0817977	134.057	0.987353	0.0871786	0.245587		686.501	0.186202	0.914844	0.0782337	0	1.39306	0.107066	0.198195		400.319	0.475443	0.177359	0.514992
27	720.725	0.199274	0.761198	0.140189	0	1.71457	0.115162	0.21255		602.33	0.170539	0.78905	0.129733	128.724	1.04275	0.144438	0.179312		272.823	0.471536	0.304226	0.519719
28	644.936	0.201568	0.921977	0.0814539	218.305	0.822282	0.119392	0.219488		603.993	0.17103	0.91207	0.0816213	110.491	0.934985	0.130062	0.186207		415.129	0.501947	0.185484	0.51213
29	709.229	0.169753	1	0.0584341	264.2	0.801265	0.145228	0.188061		661.375	0.146914	1	0.0567921	123.963	0.740912	0.158984	0.162153		503.993	0.377208	0.204368	0.389834
30	918.093	0.225496	0.755432	0.150264	128.467	1.05242	0.0882263	0.23937		785.338	0.182847	0.786342	0.124593	350.094	0.566154	0.107766	0.194761		432.793	0.404883	0.187156	0.471845
31	1046.56	0.200149	0.738058	0.130063	0	2.03057	0.118483	0.208884		967.637	0.162555	0.746803	0.116143	37.3636	2.37641	0.130475	0.169639		729.065	0.3951	0.170081	0.438628
32	783.039	0.158472	0.831025	0.111274	275.611	0.908048	0.176236	0.171127		759.998	0.131488	0.822722	0.101045	188.036	0.73886	0.183215	0.138981		685.502	0.284341	0.201312	0.276719
33	853.539	0.185918	1	0.0482035	697.312	0.446815	0.123017	0.204279		813.303	0.157202	1	0.0486705	464.219	0.411129	0.131167	0.169118		666.801	0.35588	0.157468	0.361792
34	1406.62	0.189912	0.889589	0.109063	424.975	1.03189	0.107349	0.20286		1277.52	0.154821	0.823888	0.0997871	396.091	0.655005	0.120751	0.170089		985.937	0.286432	0.153154	0.302121
35	1831.6	0.175844	0.707299	0.136031	0	1.59392	0.093361	0.188705		1448.63	0.143389	0.760466	0.119608	298.168	0.982753	0.123529	0.156506		814.217	0.286523	0.210018	0.284489
36	1462.13	0.198254	0.977116	0.0736212	842.536	0.677189	0.0930151	0.209225		1399.8	0.159532	0.934514	0.0692584	342.891	0.69504	0.0981571	0.171169		1189.68	0.38999	0.114316	0.450304
37	1876.7	0.182236	0.726983	0.136424	0	5.15722	0.0836576	0.202434		1651.02	0.149499	0.711982	0.122516	22.5492	3.69342	0.0976734	0.166802		1099.85	0.348208	0.142747	0.374073
38	1386.55	0.152643	1	0.0384439	704.806	0.432923	0.11828	0.16929		1198.05	0.127178	1	0.0772767	444.422	0.691689	0.142418	0.142603		753.007	0.276291	0.217793	0.267418
39	1712.8	0.181348	0.804488	0.134397	442.64	1.5797	0.107426	0.189507		1642.47	0.123476	0.739469	0.102775	513.022	0.760609	0.113079	0.138029		1422.33	0.212484	0.129365	0.197122
40	2155.44	0.175583	0.953445	0.0618361	1194.97	0.493962	0.0825817	0.188482		1727.58	0.115924	0.932061	0.0767692	720.966	0.487892	0.107836	0.13314		890.382	0.196147	0.199914	0.179707
41	2929	0.183649	0.890981	0.0647088	90.6589	1.06299	0.073404	0.193304		2331.17	0.102278	0.882913	0.0397407	368.136	0.426908	0.0958903	0.116096		1325.51	0.14948	0.162202	0.130729
42	2883.29	0.17195	0.684137	0.130922	0	3.34278	0.0915619	0.181628		2426.36	0.114158	0.689755	0.0919206	377.344	1.34672	0.111999	0.12562		1527.59	0.173082	0.172822	0.156323
43	2354.65	0.164229	0.887309	0.0613761	678.344	0.642731	0.084089	0.178113		2050.94	0.109226	0.910104	0.061899	308.616	0.684531	0.0993625	0.123862		1331.67	0.182329	0.148686	0.158614
44	2289.24	0.160977	0.935951	0.0830466	1236.09	0.696834	0.10178	0.17303		2175.18	0.10511	0.890948	0.0784865	879.296	0.506342	0.108251	0.12239		1883.48	0.167407	0.123707	0.151194
45	3267.36	0.18721	0.806962	0.11107	0	1.47792	0.0609055	0.196581		2817.27	0.114919	0.836007	0.0789994	442.841	0.689801	0.0725239	0.129547		1846.36	0.182216	0.10778	0.162409
46	2947.75	0.185614	0.811427	0.11109	0	2.16177	0.0675092	0.197346		2798.1	0.124733	0.812323	0.087121	0	1.77761	0.0718285	0.144037		2330.63	0.195248	0.0853846	0.179234
47	2243.99	0.159268	0.775333	0.0923262	535.633	0.803922	0.0900182	0.171372		2163.89	0.109585	0.809876	0.0732733	734.054	0.434173	0.0941442	0.125644		1867.84	0.191551	0.108146	0.173534
48	2356.47	0.132485	0.796747	0.0976346	737.179	1.30047	0.134948	0.144854		2486.54	0.0888627	0.773057	0.0734938	590.709	0.597973	0.126536	0.101511		2976.11	0.148742	0.106851	0.134674
49	2564.23	0.131153	0.952991	0.0323956	1018.74	0.480236	0.121674	0.137641		2512.94	0.0859493	0.959467	0.053308	646.997	0.507773	0.124671	0.0961509		2362.46	0.140861	0.132066	0.127341
50	3061.78	0.139189	0.80587	0.110721	0	5.2819	0.107454	0.147129		3058.08	0.0847351	0.763244	0.0794277	0	1.84455	0.107608	0.0973324		3042.87	0.131419	0.108121	0.117878
51	2499.45	0.139236	0.92902	0.0922953	1523.73	0.641916	0.0984217	0.152581		2284.55	0.0946877	0.890828	0.0699197	954.266	0.447811	0.10994	0.11293		1681.6	0.161611	0.146289	0.146916
52	3537.96	0.187792	0.855477	0.102704	79.4951	1.25023	0.0522901	0.200403		2989.41	0.125982	0.875351	0.0853642	411.758	1.04088	0.0639627	0.147309		1565.76	0.207901	0.118153	0.193334
53	3366.33	0.179789	0.796915	0.124251	113.459	2.10036	0.0528766	0.191389		3028.54	0.122636	0.787848	0.0936728	276.752	1.57944	0.0600335	0.145816		2011.05	0.207984	0.0885109	0.188835
54	2993.27	0.146545	0.895078	0.0700228	729.867	0.827574	0.0781753	0.158107		2662.78	0.0968839	0.888173	0.0160104	434.827	0.342422	0.0900522	0.110802		1814.93	0.158908	0.128931	0.140099
55	3115.25	0.146034	0.79496	0.120767	0	4.42683	0.0808924	0.156208		2799.84	0.116613	0.76448	0.10142	0	2.69761	0.0919658	0.127545		1910.69	0.291642	0.131889	0.303363
56	2455.19	0.140324	0.802005	0.116464	511.159	1.45931	0.078609	0.153879		2105.09	0.118191	0.763675	0.101511	315.101	1.17676	0.0953338	0.131902		1198.09	0.256364	0.16109	0.245788
57	2462.94	0.124393	0.917702	0.0389088	261.05	0.550571	0.0759256	0.138669		1922.7	0.11119	0.981545	0.045258	204.35	0.786124	0.103814	0.126968		840.383	0.331021	0.222518	0.342573
58	2236.34	0.130758	0.721711	0.128608	0	6.49957	0.0961394	0.146645		2091.57	0.109787	0.704926	0.110613	149.796	2.25643	0.104561	0.12627		1654.09	0.257888	0.129981	0.257088
59	1813.32	0.134865	0.89697	0.101854	460.4	1.00473	0.087133	0.156057		1624.2	0.116093	0.854672	0.0949792	80.8672	1.90469	0.100766	0.136572		983.926	0.410572	0.160581	0.448593
60	1769.09	0.137229	0.992001	0.0464334	1202.21	0.39073	0.0717882	0.156657		1469.02	0.115995	0.982569	0.030323	809.433	0.312093	0.0922437	0.137701		542.251	0.303097	0.234209	0.329417
61	2789.03	0.129479	0.927286	0.0512649	123.467	0.729825	0.0731438	0.140854		2252.85	0.113929	0.950091	0.0483634	436.978	0.622319	0.0951368	0.123234		1162.13	0.275614	0.17554	0.25583
62	2890.19	0.135518	1	0.0336099	763.139	0.601854	0.0826936	0.14905		2577.39	0.119874	0.992665	0.0540627	545.001	0.718718	0.0950861	0.132569		1817.72	0.289703	0.131484	0.28947
63	3443.17	0.147173	0.733265	0.128025	0	4.49021	0.074931	0.158002		3103.48	0.12283	0.716806	0.107733	294.728	1.76344	0.0847998	0.137563		2233.5	0.28695	0.115514	0.297863
64	2888.79	0.138913	0.942719	0.0488641	995.976	0.552523	0.0837721	0.148047		2519.32	0.114756	0.955319	0.0614258	463.98	0.795525	0.0989789	0.12516		1579.33	0.273757	0.153229	0.277764
65	3114.22	0.150065	0.817796	0.103626	455.382	1.10481	0.0818824	0.159032		2870.74	0.119388	0.810656	0.0840199	773.391	0.580923	0.0902789	0.133841		2114.12	0.268142	0.120618	0.276367
66	3391.22	0.139838	0.682172	0.121361	0	6.77055	0.0843355	0.150617		3100.57	0.115074	0.669162	0.100493	0	9.17362	0.0937531	0.12649		2428.05	0.277739	0.11779	0.298538
67	2165.79	0.117534	0.95599	0.0405619	2455.86	0.262015	0.109429	0.129717		1951.53	0.0977281	0.931206	0.0322615	1552.45	0.240783	0.124714	0.11064		1361.16	0.214124	0.174117	0.210428
68	3933.3	0.130624	0.652999	0.0999899	0	27.7993	0.0907635	0.140461		3369.72	0.105663	0.651231	0.0848185	0	9.56215	0.108577	0.114564		2437.94	0.18986	0.146435	0.180315
69	2360.31	0.0983558	0.595427	0.0765495	239.142	8.33194	0.154641	0.107745		2115.79	0.0854541	0.557578	0.0687352	246.341	4.87747	0.176768	0.0923921		1629.19	0.193821	0.224038	0.18933
70	1780.42	0.0676609	1	0	1421.53	0.151077	0.238146	0.0764168		1426.06	0.0602958	0.959738	0	291.701	0.201954	0.316336	0.0651107		910.631	0.136543	0.465611	0.130503
71	2481.64	0.0894557	0.409121	0.103609	0	5.88321	0.205107	0.0966719		1660.35	0.0758029	0.489523	0.092655	633.757	0.2869	0.327804	0.0779678		1001.81	0.143685	0.508079	0.134682
72	1599.35	0.0965279	0.587002	0.0937513	651.806	0.401428	0.24385	0.103179		1446.53	0.0840035	0.660383	0.090083	501.134	0.434533	0.274747	0.0868577		1220.66	0.166362	0.319499	0.157934
73	1306.13	0.105668	0.635244	0.0776104	520.835	0.670393	0.271795	0.114924		1456.4	0.0899409	0.658404	0.0671479	496.602	0.460788	0.238811	0.0956931		1819.03	0.19499	0.195159	0.185951
74	1287.54	0.120189	0.583962	0.0416304	282.558	0.757805	0.284264	0.131399		1455.5	0.10193	0.615934	0.0532825	370.301	0.822712	0.2467	0.108254		1813.86	0.203949	0.201779	0.194528
75	1100.46	0.146697					0.307145	0.153176		1266.79	0.11304	1	0.00693141	792.473	5.80846	0.262258	0.119886		1507.83	0.21405	0.224163	0.207964
76										2059.27	0.134335		NA			0.156631	0.0906818		2051.84	0.134335	0.156932	0.126516
							0.790285
							0.521703

## Sheet: Start-Monday
PSP	Ni	phi	Bi	pi	betai	taui
1	486.23732560826	0.907607947292111	0	0.216650705548295	-3.99059942546974	0.905755288641774
2	400.011931429292	0.573061991006811	101.703333891019	0.351149986876917	-3.32645191349048	0.706678535978607
3	330.934967742368	0.73548772346735	230.876821813514	0.409292434505967	-3.11199971437988	0.653538579863495
4	474.27542785409	0.69826492454471	49.0930604226604	0.271364072798428	-3.70845902135978	0.830950652114196
5	380.262956266606	0.754569360792964	94.2085999543528	0.275592253275525	-3.72337217560994	0.853704548587989
6	381.143375797689	0.692663504532042	65.1146490640897	0.321923160569749	-3.49063860561943	0.776622551368928
7	329.11875547329	0.853120717090717	199.019887531112	0.322531155756961	-3.42243963059672	0.71862988814097
8	479.797916208489	0.724182230976013	12.1029846990475	0.244903181470503	-3.83846191266886	0.865378964436728
9	359.564110076553	0.719875911145867	108.704872392514	0.27188547667364	-3.73598642108044	0.854637655561268
10	367.546413749225	0.742582086905991	80.9865214639944	0.306050638707807	-3.50681760810514	0.750091964534602
11	353.919904420707	0.69228852785068	67.3992461697176	0.293964595317564	-3.61392517791912	0.81095712630263
12	312.413935778182	0.860283238644262	130.245784715547	0.330818233073597	-3.46597258281338	0.776543902064984
13	399.010257184402	0.873149422040483	70.0474185494317	0.28993970252789	-3.6702623276739	0.845691346351654
14	418.442993998217	0.79320508558007	150.967219199409	0.246494730798407	-3.80950799220627	0.844973399687682
15	482.878330064145	0.812465314723681	10.8012762877089	0.254889634438658	-3.80007687608739	0.86202409513563
16	403.12317069652	0.825372260412951	237.683870781252	0.304990028424035	-3.59632662286558	0.822268717911438
17	570.410553403875	0.716002144180378	255.935732644202	0.141488565778578	-4.37946565465206	0.907721655354201
18	664.350911944492	0.813356337229385	116.955099644732	0.0947313486228648	-4.94985196891212	1.14905895396527
19	657.309124018906	0.801629538692726	0	0.113302557053746	-4.6698326788267	1.01296992552009
20	473.770730494399	0.766641596650582	230.729530527868	0.117184359047704	-4.64370916478369	1.01883684538336
21	593.941879800407	1	0	0.125136303538878	-4.51195222296845	0.928353741743728
22	552.283160747725	0.836080509964742	279.414801498864	0.125039126208101	-4.62405030080019	1.05968946633873
23	741.167988181762	0.873785262369439	142.516853283055	0.0876452120804685	-5.01635740292094	1.14921808929076
24	790.138518296285	0.6879608987339	0	0.0742986140205618	-5.18586742051503	1.17639995618775
25	472.628492634922	0.710880031898164	351.659795709435	0.121223676207461	-4.54093378035054	0.926418386722414
26	687.641953629729	0.920417075540274	0	0.113879497085508	-4.67709914016005	1.02764126678765
27	586.712527117791	0.809667423884954	180.322033037066	0.146018609073786	-4.35985793619285	0.920551516816906
28	655.364053429559	0.901675982200955	68.6089222141474	0.121212545939567	-4.56818870709309	0.963169970288135
29	659.534948789444	1	167.193241180509	0.158913255645696	-4.26365711944648	0.899941534181703
30	826.728189969953	0.686310612880366	268.145899817264	0.102765140735673	-4.83351384293803	1.10140066498831
31	835.538230561018	0.855460608656232	141.924047554535	0.15337840367554	-4.29229579459708	0.894123819194588
32	856.694090825815	0.780489502268949	108.963746901964	0.163240633966317	-4.28343292580677	0.949737878233063
33	777.604491447354	1	624.990940016148	0.128955801679449	-4.58045648222531	1.04265871678368
34	1402.5954314635	0.778822126964247	308.831565173663	0.117034131977781	-4.7137637044065	1.09221635594614
35	1401.2039223764	0.840049703569652	370.170227744125	0.119851381025381	-4.64085528109077	1.03889619484782
36	1547.25116737706	0.868457302816572	233.605496659784	0.0928862296197247	-4.93192981347035	1.11194316899123
37	1577.32707225986	0.742779636521952	110.441228266958	0.102849657558697	-4.80594016002028	1.07129555451864
38	1282.04765767637	0.982048639693073	371.309794219723	0.135296721261967	-4.51132057616642	1.01457143579096
39	1630.34295246249	0.805735743504776	373.750070983384	0.115014123169275	-4.67882089689937	1.04023648098164
40	1687.37566195352	0.903146506358792	873.538322748823	0.107945739612796	-4.73397568876943	1.03740352359454
41	2397.485756757	0.885998115177368	292.151614502461	0.0994988714521087	-4.8563905969835	1.09540404261636
42	2416.31947615375	0.700896184566883	346.14976536894	0.106513399292322	-4.73365984923004	1.02139266567362
43	2039.73886689975	0.940742846268532	432.306003055821	0.103643594668349	-4.8028772119075	1.07576221808467
44	2351.17575034764	0.910717260368002	954.775049804636	0.0965516881690509	-4.90913739140401	1.12426157730463
45	3096.03138780492	0.709861675940266	148.854099293642	0.0717015345202601	-5.24753426251709	1.21099629611253
46	2346.60812900451	0.950912067287414	207.159365692577	0.0732616193393897	-5.20314722659165	1.18203878693018
47	2438.57735275771	0.75178564851049	627.556253043639	0.0925556289181697	-4.90914768657973	1.08030426570243
48	2460.84370962959	0.779874342056551	558.325001937983	0.129376977611672	-4.50785304007567	0.964058903383029
49	2477.47387088936	0.949896991291858	611.577375640684	0.124990914033661	-4.56608476669476	0.996372758497684
50	2964.92235160268	0.819866864235185	0	0.109421833526473	-4.66698805656379	0.965607921620724
51	2391.03267480642	0.82651005196914	965.424414919154	0.100343872287219	-4.84406861923912	1.08993408014033
52	2941.63695523332	0.90565642122778	369.006844562949	0.0611014599155817	-5.37553283776974	1.19088081877782
53	3033.11924199094	0.757572954027411	401.493784529509	0.0640757463438779	-5.34400465558318	1.20703847696433
54	2699.30288860197	0.942756932475298	237.940278493718	0.0917958948151696	-4.94418505937481	1.11395673013488
55	2782.72678957382	0.761312200758744	143.68744789916	0.0914324687937287	-4.90449992282969	1.05934113069153
56	2262.21130417992	0.753215341012857	196.5767937054	0.0911409537682866	-4.95413720665091	1.11810371590209
57	1900.50905262642	0.918078433896479	132.574874047953	0.106731932147686	-4.78896423911889	1.08904224969644
58	1877.3912486893	0.796234819922458	269.38707024173	0.108111645104498	-4.77538178691706	1.08648088331795
59	1764.23135306585	0.780174788683648	94.8842813026313	0.0970447097780349	-4.89840266865073	1.11754170945557
60	1471.29310436985	1	785.814133054806	0.0873918181023146	-4.99025511798528	1.11627248850202
61	2257.10723742465	0.96358546493081	609.128715039083	0.0995084764469545	-4.86777890236343	1.10808014951294
62	2784.04444181161	0.961444392565505	330.503694138563	0.0863250614272548	-5.05397371523177	1.17465116947267
63	3007.2076113715	0.719966605945258	436.299321804158	0.0867036458547598	-4.98750869902593	1.10389088277742
64	2601.38837913604	0.987886868311702	519.294180115256	0.0976822964024701	-4.87549359634871	1.09853569547569
65	3089.17159924242	0.807674113863496	606.472563275701	0.0843666879342194	-4.99360995634586	1.07836310612564
66	3101.5164972661	0.645888212326581	0	0.0926783207022612	-4.95444569916922	1.13474943981783
67	1960.43475223266	0.940467973294933	1457.12613528024	0.122764438647002	-4.60480698099716	1.02252350778609
68	3300.85223348945	0.651322990693904	6.16676983352272	0.113582485445303	-4.72439454684296	1.07785448771077
69	2156.08771838852	0.540519243547898	184.530716450263	0.175596009216475	-4.21926710015404	0.949634029699797
70	1349.93761901654	1	386.133415637552	0.316498831127013	-3.51471528210892	0.78373162593963
71	1736.07103465409	0.479143161543978	593.828341711241	0.32430244052754	-3.4610001151036	0.757613013939855
72	1425.65490592033	0.673375156224938	594.989593428463	0.277803292985269	-3.64066428904256	0.789840227492959
73	1554.99018842541	0.6126405703335	384.695736401899	0.232811428013538	-3.82436595986258	0.808541535031287
74	1337.34581230184	0.646815335446891	390.802503766045	0.257702540389858	-3.69031734055738	0.769292723885924
75	1255.81828395855	1	886.482255777854	0.267280359662734	-3.66096656757344	0.774749533362107
76	2142.30053973641	NA	NA	0.143304037895801	-4.41597724672966	0.966592983637618

## Sheet: Start-Tuesday
PSP	Ni	phi	Bi	pi	betai	taui
1	479.278384864688	0.801245993312217	0	0.242100899602711	-3.83366066300929	0.852353188137173
2	346.702593896142	0.645584363507949	149.727411944589	0.390135393209292	-3.17869856598314	0.668887851201716
3	373.553185351585	0.677746428021574	177.519097864123	0.352512137151071	-3.37046964613827	0.746687565408588
4	430.693434912241	0.774401888296767	94.104920093559	0.292613741249724	-3.62338233783413	0.815353250951638
5	427.634729366619	0.668432536439515	46.4184911848648	0.258592169519585	-3.77816481523795	0.854153768640714
6	332.263458005019	0.757309768664695	83.2762762616953	0.321659468168277	-3.4660670723768	0.75544042555288
7	334.902638779208	0.868876111496385	201.543242364101	0.321420635971986	-3.47629861441371	0.763566922489477
8	492.532144876458	0.671573187261242	26.4145082705588	0.247988742142155	-3.83995930158457	0.875548857761853
9	357.185890633858	0.751458958066529	97.8951187759307	0.290255558544097	-3.62580636823938	0.811498331881571
10	366.305655987714	0.745526292794878	102.721317374399	0.289487996911243	-3.59573707993248	0.783553022675522
11	375.811815112716	0.678790555746852	57.0410383172511	0.292411676706088	-3.63294645216823	0.822540774295928
12	312.138549153845	0.905727116481432	132.259396243801	0.321347598612228	-3.51502571147076	0.794706250841569
13	414.971744311611	0.82462305086999	70.9260825245216	0.267661929786314	-3.76325309579708	0.865585314471287
14	413.121348343603	0.782727650062359	147.853386397011	0.263719154983245	-3.72492574545309	0.823237951976032
15	471.214888576593	0.933196831502019	9.90218864411742	0.261149903362624	-3.78478967033786	0.866297022993339
16	449.638429620371	0.641136156856311	286.162019772825	0.272189308833524	-3.73421858807578	0.853993297257066
17	574.441474514536	0.770210402889688	176.92882132266	0.124661100216757	-4.55167873327078	0.975703842689955
18	619.369620845047	0.95650709244615	62.8173866951136	0.115978244020654	-4.6643214487635	1.03213509135612
19	655.248821879084	0.678000606357579	17.2741714305473	0.105298401934902	-4.77136755927857	1.05542037692695
20	461.533269979655	0.875460521150116	147.243687429783	0.115727183459951	-4.68046854952507	1.04835748323516
21	551.297844494289	0.932055318684879	117.412595923183	0.138387376437688	-4.3841540586846	0.885867531701339
22	631.252684063595	0.807139326392898	126.406509340136	0.107958043562126	-4.80569040752475	1.11548997755531
23	635.915375538934	0.892805078541478	170.771720384132	0.0952710521423048	-4.91041853366838	1.11301228772143
24	738.520197187904	0.665098791070545	0	0.0804066718693265	-5.10235228713376	1.16083943582825
25	448.795339264778	0.748018637500357	334.340832464073	0.126170533436762	-4.44781631998086	0.848778840083974
26	670.048110657422	0.941743172160526	0	0.129289654381878	-4.51960057713355	0.977758583080818
27	556.5818225056	0.843401339518647	233.296783511975	0.133660244467252	-4.39765353732224	0.8578558319806
28	702.718638164928	0.843236309189547	116.473529280869	0.132023521822265	-4.49525352051753	0.971621407175982
29	709.031400125768	0.946081712869041	0	0.150655006102256	-4.32274513040133	0.910944112248789
30	653.189626756381	0.778489171257583	277.423727759223	0.135703536017331	-4.46992929378784	0.971538382784668
31	785.924778966849	0.823596398572881	224.010798520752	0.167186935890618	-4.20281866813861	0.884096666404374
32	871.295616027036	0.76953340972021	21.3525020456591	0.156643391242854	-4.30607601798376	0.93392892343293
33	691.843588321215	1	796.449602518314	0.138060637248168	-4.49665110129607	1.01758930465996
34	1488.29319083953	0.834998903639409	61.7389740459139	0.125774511532365	-4.61123867574323	1.0519954204769
35	1304.46215669092	0.814685798174095	734.663300064466	0.116325034908775	-4.6689888172524	1.0406066133092
36	1797.39009337611	0.866687685743654	5.25104282397137	0.0868365565788199	-5.01693613582344	1.14090993878629
37	1563.02690323068	0.770786095689609	78.2191612871602	0.101718209485017	-4.82399590845292	1.08080139758196
38	1282.97856548616	0.886900275648008	439.001640616917	0.137776564698291	-4.48702668560781	1.00582572607825
39	1576.87568399708	0.922749650398971	569.932740289732	0.122867453796608	-4.61255594117506	1.03200940806439
40	2024.99422642067	0.809239063339821	589.580633467067	0.0865390825652018	-4.98169694921382	1.09413489400371
41	2228.28506452428	0.926498546678818	488.476404859653	0.114023956129918	-4.69290763404627	1.0474914213175
42	2552.97927872751	0.727788560111642	250.663402354273	0.0939255903480996	-4.87963850718422	1.05958981179427
43	2108.69251561423	0.893866654447543	639.87664312933	0.103053540569197	-4.82291968920858	1.09260770812848
44	2524.76656731999	0.888755671245229	776.113070820044	0.0881713781112561	-5.02674911042104	1.16533232337327
45	3020.01367609604	0.680228475528713	0	0.0761119448474585	-5.15942254719185	1.17054458587851
46	1931.71600115331	1	497.884101849827	0.0736799291316046	-5.1953859542344	1.17884641263055
47	2429.60010300314	0.848559874916034	729.753595288543	0.107813484402873	-4.73948048524451	1.04278609194371
48	2791.41475478887	0.705379742921527	635.778975230231	0.111566558773621	-4.710733126785	1.04550317952943
49	2604.78639735056	0.917632674145568	304.68563472997	0.119851263023976	-4.60133269002581	0.99220669721372
50	2694.92274210877	0.866184140778307	70.5084117157894	0.119385581063492	-4.57080586946928	0.947425902956274
51	2404.80775155319	0.825328345576494	1059.8325382297	0.0884512790707004	-4.98471677333791	1.12261405111818
52	3044.58854124862	0.900118237385562	243.90345892318	0.0632632467385316	-5.33405503630089	1.17813628804663
53	2984.39313023617	0.712261974487327	450.594034959667	0.070536776867046	-5.2343047268934	1.17846946841334
54	2576.26377854809	0.99210290380848	93.3695876615111	0.101050389931491	-4.81538305282957	1.0634321432657
55	2649.28836333568	0.726123877300711	223.63165876318	0.0908393838235647	-4.91383720041074	1.06374743586331
56	2147.34319723614	0.813045962740598	102.243938276301	0.0920918159645722	-4.93283728670542	1.10396182566573
57	1848.13265540763	0.889044985125547	309.527641551154	0.115016037539318	-4.70031468023298	1.06406122993243
58	1952.60071068807	0.750583740932828	218.245079468182	0.100993219979445	-4.84645736549403	1.09897922313453
59	1683.83542544453	0.838893997283395	157.53436531767	0.0996707781313347	-4.8875883130401	1.12995528086795
60	1570.09379613622	1	607.560970312732	0.0812666618548711	-5.07515974246942	1.13985971048382
61	2177.65476644895	1	831.170426622698	0.10380543314304	-4.81868105501237	1.09491456031703
62	3008.82519307165	0.915620864160574	317.194661793233	0.0843221009266263	-5.07223150870438	1.1730259827289
63	3072.1377851816	0.704525307124693	236.454920354072	0.0858373259346683	-4.99517257438238	1.10191105552439
64	2400.85373698852	1	1017.98388609715	0.106488705057592	-4.76571034479021	1.06077302384109
65	3418.83762308567	0.78779093284203	376.432113578484	0.0756338065418165	-5.1289582065851	1.1242777810402
66	3069.76139390457	0.669502414561743	220.497402791814	0.0867510706290736	-5.04323995074885	1.16809041613984
67	2275.71006813935	0.852467351233207	1119.89655858115	0.121169331838652	-4.62925764842503	1.03680386212795
68	3059.86509254264	0.599971807590652	0	0.12925508542499	-4.56601269033146	1.029949115654
69	1815.76058393229	0.606302592937436	357.048338080926	0.18510673101807	-4.16911429198953	0.945172889505165
70	1457.94868827267	0.997117889056317	281.44817391194	0.336120036066433	-3.45282925519018	0.777395848924764
71	1735.19489231481	0.510178830185179	539.693937691996	0.312530717014094	-3.46544477142226	0.730305055136344
72	1424.95363799646	0.642796896619024	709.818149726972	0.269346339818737	-3.66275385162851	0.783573142562225
73	1625.77392605709	0.653711358561331	297.62928768666	0.220547571223615	-3.90339462130465	0.838219030637897
74	1360.41616960303	0.656922679319781	461.398038499739	0.244309303952063	-3.77200356471032	0.801219029935379
75	1355.08627362531	1	573.419655405187	0.256138122878802	-3.71116677763945	0.784679393659744
76	1928.5059290305	NA	NA	0.137644185364303	-4.46698405551805	0.983037880240718

## Sheet: Freq-Week
	MA 1
	fi	ui	vi	ni
i = 1	7662	99	44	99
i = 2	881	111	89	149
i = 3	274	89	77	143
i = 4	144	88	76	135
i = 5	112	57	51	101
i = 6	64	73	72	128
i = 7	36	50	50	102
i = 8	17	70	64	114
i = 9	28	51	58	100
i = 10	15	60	61	110
i = 11	15	55	52	103
i = 12	11	54	45	103
i = 13	7	58	51	110
i = 14	4	56	58	107
i = 15	11	70	73	124
i = 16	7	51	79	113
i = 17	3	50	59	84
i = 18	4	42	37	57
i = 19	4	55	53	77
i = 20	3	29	33	50
i = 21	1	50	41	71
i = 22	1	44	51	75
i = 23	0	47	47	67
i = 24	1	38	38	54
i = 25	0	36	36	57
i = 26	0	56	38	71
i = 27	1	58	48	83
i = 28	3	52	39	77
i = 29	0	68	56	103
i = 30	1	51	52	81
i = 31	0	89	74	124
i = 32	3	88	76	138
i = 33	1	67	55	105
i = 34	1	104	100	151
i = 35	0	126	117	171
i = 36	0	96	83	136
i = 37	0	114	103	157
i = 38	0	110	98	164
i = 39	0	121	126	184
i = 40	1	131	118	178
i = 41	0	166	150	215
i = 42	0	196	192	264
i = 43	0	144	130	198
i = 44	0	162	159	233
i = 45	0	150	140	199
i = 46	0	147	135	199
i = 47	0	135	134	202
i = 48	0	226	208	318
i = 49	0	224	201	312
i = 50	0	232	231	329
i = 51	0	156	172	246
i = 52	0	133	132	185
i = 53	0	127	125	178
i = 54	0	166	159	234
i = 55	0	177	176	252
i = 56	0	124	130	193
i = 57	0	126	120	187
i = 58	0	133	145	215
i = 59	0	96	95	158
i = 60	0	75	76	127
i = 61	0	146	131	204
i = 62	0	167	160	239
i = 63	0	180	187	258
i = 64	0	167	165	242
i = 65	0	173	184	255
i = 66	0	205	206	286
i = 67	0	150	157	237
i = 68	0	275	254	357
i = 69	0	246	241	365
i = 70	0	280	239	424
i = 71	0	286	413	509
i = 72	0	253	278	390
i = 73	0	225	249	355
i = 74	0	239	271	366
i = 75	0	215	271	338
i = 76	0	200	322	322
	9316

## Sheet: Freq-Day
	MA 1
PSP	fi	ui	vi	ni
i = 1	7193	12	4	12
i = 2	1018	18	7	19
i = 3	345	17	9	25
i = 4	183	15	4	22
i = 5	116	10	5	23
i = 6	77	15	7	28
i = 7	64	12	8	24
i = 8	39	12	8	17
i = 9	38	20	16	34
i = 10	37	13	10	33
i = 11	17	10	9	29
i = 12	16	22	20	47
i = 13	19	24	17	42
i = 14	14	10	9	22
i = 15	9	7	6	15
i = 16	9	12	10	32
i = 17	18	9	7	37
i = 18	19	15	13	39
i = 19	8	18	15	38
i = 20	3	12	12	32
i = 21	6	16	14	33
i = 22	5	5	6	13
i = 23	4	11	10	28
i = 24	6	14	9	37
i = 25	6	4	4	24
i = 26	3	14	14	31
i = 27	1	20	14	35
i = 28	4	20	19	35
i = 29	4	5	3	11
i = 30	2	7	6	30
i = 31	6	8	9	25
i = 32	2	10	9	34
i = 33	1	7	5	23
i = 34	1	8	9	19
i = 35	1	12	10	26
i = 36	1	7	7	15
i = 37	2	13	13	31
i = 38	3	16	15	33
i = 39	3	11	14	35
i = 40	7	7	7	31
i = 41	0	7	6	35
i = 42	0	12	10	24
i = 43	3	2	2	11
i = 44	0	0	0	0
i = 45	1	9	8	30
i = 46	0	10	8	26
i = 47	0	9	8	27
i = 48	3	11	11	34
i = 49	2	9	13	32
i = 50	1	5	6	12
i = 51	0	2	1	11
i = 52	0	12	12	23
i = 53	1	17	13	40
i = 54	0	16	16	40
i = 55	1	11	11	30
i = 56	1	7	5	22
i = 57	0	7	8	14
i = 58	1	5	6	23
i = 59	1	1	4	14
i = 60	0	7	8	24
i = 61	0	9	10	34
i = 62	2	4	6	28
i = 63	1	18	16	29
i = 64	0	3	3	7
i = 65	1	10	8	29
i = 66	0	9	10	30
i = 67	1	10	11	30
i = 68	1	7	9	31
i = 69	1	7	8	23
i = 70	0	14	12	22
i = 71	0	4	1	6
i = 72	0	5	5	20
i = 73	0	6	7	26
i = 74	0	12	10	28
i = 75	0	8	8	28
i = 76	1	9	10	30
i = 77	0	11	11	27
i = 78	0	3	2	8
i = 79	0	11	9	32
i = 80	0	5	5	23
i = 81	0	5	5	24
i = 82	0	11	10	34
i = 83	0	9	7	30
i = 84	0	10	7	22
i = 85	0	1	2	7
i = 86	1	9	7	28
i = 87	0	12	8	33
i = 88	0	11	7	34
i = 89	0	6	8	31
i = 90	0	6	6	27
i = 91	0	13	13	29
i = 92	0	7	7	13
i = 93	0	6	7	15
i = 94	0	9	8	30
i = 95	0	6	13	27
i = 96	0	7	4	23
i = 97	0	12	13	31
i = 98	0	9	6	21
i = 99	0	2	5	7
i = 100	0	10	10	26
i = 101	0	4	5	25
i = 102	0	10	8	30
i = 103	0	18	17	39
i = 104	0	13	16	35
i = 105	0	13	12	32
i = 106	0	2	2	6
i = 107	0	10	9	31
i = 108	0	6	9	31
i = 109	0	9	16	37
i = 110	0	5	10	31
i = 111	0	10	19	39
i = 112	0	9	14	29
i = 113	0	5	6	9
i = 114	0	9	15	23
i = 115	0	4	3	7
i = 116	0	4	6	11
i = 117	0	6	5	10
i = 118	0	13	16	25
i = 119	1	9	8	16
i = 120	0	3	4	7
i = 121	0	8	5	12
i = 122	0	7	9	13
i = 123	0	5	3	10
i = 124	0	3	4	11
i = 125	0	10	6	17
i = 126	0	6	6	11
i = 127	0	5	8	9
i = 128	0	14	9	19
i = 129	0	6	6	18
i = 130	0	11	10	17
i = 131	0	8	10	14
i = 132	0	2	2	4
i = 133	0	9	8	13
i = 134	0	2	3	6
i = 135	0	7	8	13
i = 136	0	2	3	9
i = 137	0	5	7	15
i = 138	0	6	5	10
i = 139	0	4	4	7
i = 140	0	3	3	8
i = 141	0	5	5	7
i = 142	0	7	5	12
i = 143	0	8	4	14
i = 144	1	9	8	15
i = 145	0	8	9	18
i = 146	0	6	6	8
i = 147	0	7	4	11
i = 148	0	7	8	11
i = 149	0	5	9	15
i = 150	0	4	3	13
i = 151	0	6	5	11
i = 152	0	7	8	18
i = 153	0	2	6	13
i = 154	0	13	12	18
i = 155	0	3	4	5
i = 156	0	9	8	14
i = 157	0	7	8	13
i = 158	0	3	3	11
i = 159	0	9	8	13
i = 160	0	9	7	15
i = 161	0	7	9	13
i = 162	0	1	1	3
i = 163	0	4	4	8
i = 164	0	6	6	12
i = 165	0	5	7	11
i = 166	0	8	6	10
i = 167	0	3	3	8
i = 168	0	11	11	15
i = 169	0	4	3	7
i = 170	0	4	4	10
i = 171	0	6	6	8
i = 172	0	3	4	8
i = 173	0	6	6	9
i = 174	0	4	5	15
i = 175	0	9	8	14
i = 176	0	2	2	4
i = 177	0	4	2	8
i = 178	0	8	8	15
i = 179	0	18	9	26
i = 180	0	5	7	8
i = 181	0	8	4	13
i = 182	0	11	6	16
i = 183	0	6	4	11
i = 184	0	10	6	19
i = 185	0	0	0	1
i = 186	0	7	4	9
i = 187	0	12	14	29
i = 188	0	7	9	17
i = 189	0	16	11	22
i = 190	0	4	3	10
i = 191	0	0	0	0
i = 192	0	4	3	6
i = 193	0	13	9	22
i = 194	0	13	8	25
i = 195	0	7	7	16
i = 196	0	11	9	16
i = 197	0	6	4	11
i = 198	0	10	10	20
i = 199	0	14	8	26
i = 200	0	9	10	20
i = 201	0	7	4	16
i = 202	0	16	13	27
i = 203	0	6	7	16
i = 204	0	5	4	8
i = 205	0	14	11	21
i = 206	0	11	11	27
i = 207	0	2	3	8
i = 208	0	1	1	2
i = 209	0	9	10	22
i = 210	0	9	12	19
i = 211	0	5	6	10
i = 212	0	12	9	24
i = 213	0	15	11	27
i = 214	0	20	18	34
i = 215	0	7	6	9
i = 216	0	21	16	30
i = 217	0	9	8	22
i = 218	0	4	3	14
i = 219	0	11	12	32
i = 220	0	11	11	21
i = 221	0	8	7	20
i = 222	0	13	14	29
i = 223	0	20	14	39
i = 224	0	21	15	34
i = 225	0	7	7	13
i = 226	0	11	8	21
i = 227	0	10	8	24
i = 228	0	15	13	29
i = 229	0	14	11	31
i = 230	0	2	3	10
i = 231	0	8	5	13
i = 232	0	1	4	6
i = 233	0	5	3	15
i = 234	0	21	16	41
i = 235	0	17	20	36
i = 236	0	13	15	30
i = 237	0	22	17	39
i = 238	0	25	25	42
i = 239	0	12	12	21
i = 240	0	25	16	41
i = 241	0	15	17	37
i = 242	0	14	14	31
i = 243	0	21	19	36
i = 244	0	25	19	38
i = 245	0	14	20	27
i = 246	0	4	2	5
i = 247	0	6	8	18
i = 248	0	13	10	23
i = 249	0	17	19	30
i = 250	0	18	14	32
i = 251	0	18	17	34
i = 252	0	20	13	27
i = 253	0	10	9	14
i = 254	0	21	16	34
i = 255	0	15	12	26
i = 256	0	18	16	30
i = 257	0	12	13	29
i = 258	0	22	19	38
i = 259	0	16	18	28
i = 260	0	9	9	16
i = 261	0	17	14	31
i = 262	0	12	15	33
i = 263	0	21	16	40
i = 264	0	14	10	29
i = 265	0	27	25	47
i = 266	0	10	9	31
i = 267	0	13	13	18
i = 268	0	16	20	35
i = 269	0	12	13	25
i = 270	0	16	13	32
i = 271	0	23	23	43
i = 272	0	21	20	38
i = 273	0	20	24	39
i = 274	0	17	10	24
i = 275	0	22	21	48
i = 276	0	17	20	30
i = 277	0	17	10	26
i = 278	0	22	22	39
i = 279	0	18	18	39
i = 280	0	18	17	25
i = 281	0	10	9	16
i = 282	0	22	21	33
i = 283	0	25	19	38
i = 284	0	22	18	44
i = 285	0	30	25	49
i = 286	0	27	27	50
i = 287	0	30	31	48
i = 288	0	23	19	37
i = 289	0	31	30	55
i = 290	0	32	26	52
i = 291	0	30	32	55
i = 292	0	25	25	47
i = 293	0	35	37	55
i = 294	0	20	23	31
i = 295	0	11	8	15
i = 296	0	20	18	30
i = 297	0	18	19	37
i = 298	0	23	20	44
i = 299	0	18	14	36
i = 300	0	27	25	42
i = 301	0	27	26	48
i = 302	0	15	14	27
i = 303	0	23	26	42
i = 304	0	31	26	52
i = 305	0	19	22	48
i = 306	0	24	23	47
i = 307	0	23	20	44
i = 308	0	27	28	46
i = 309	0	11	11	12
i = 310	0	25	22	40
i = 311	0	23	24	39
i = 312	0	17	14	28
i = 313	0	23	17	39
i = 314	0	21	28	51
i = 315	0	30	24	44
i = 316	0	26	28	35
i = 317	0	31	25	43
i = 318	0	26	29	45
i = 319	0	18	13	34
i = 320	0	16	12	35
i = 321	0	18	18	33
i = 322	0	12	10	15
i = 323	0	1	2	3
i = 324	0	4	1	7
i = 325	0	18	22	39
i = 326	0	28	30	55
i = 327	0	28	27	44
i = 328	0	28	28	52
i = 329	0	28	24	45
i = 330	0	21	21	29
i = 331	0	31	24	58
i = 332	0	26	24	45
i = 333	0	35	31	61
i = 334	0	41	40	66
i = 335	0	35	33	61
i = 336	0	37	35	65
i = 337	0	24	22	37
i = 338	0	26	30	54
i = 339	0	43	36	75
i = 340	0	26	20	49
i = 341	0	36	30	58
i = 342	0	35	30	64
i = 343	0	34	33	55
i = 344	0	20	19	32
i = 345	0	33	31	50
i = 346	0	26	30	45
i = 347	0	37	39	61
i = 348	0	37	31	61
i = 349	0	43	41	83
i = 350	0	36	40	53
i = 351	0	15	14	29
i = 352	0	25	26	52
i = 353	0	20	27	47
i = 354	0	26	28	49
i = 355	0	16	15	36
i = 356	0	25	32	56
i = 357	0	29	30	44
i = 358	0	7	10	16
i = 359	0	7	7	13
i = 360	0	22	22	34
i = 361	0	20	19	35
i = 362	0	19	19	33
i = 363	0	29	26	49
i = 364	0	29	29	42
i = 365	0	0	0	0
i = 366	0	18	16	28
i = 367	0	20	21	31
i = 368	0	13	12	24
i = 369	0	19	17	33
i = 370	0	27	30	53
i = 371	0	30	29	45
i = 372	0	9	9	15
i = 373	0	28	28	49
i = 374	0	29	29	47
i = 375	0	22	21	45
i = 376	0	19	16	38
i = 377	0	27	25	50
i = 378	0	32	31	50
i = 379	0	18	11	27
i = 380	0	37	32	61
i = 381	0	30	34	48
i = 382	0	20	23	40
i = 383	0	24	30	46
i = 384	0	19	19	40
i = 385	0	29	27	45
i = 386	0	12	11	20
i = 387	0	22	23	45
i = 388	0	18	17	37
i = 389	0	24	25	46
i = 390	0	12	17	30
i = 391	0	20	23	42
i = 392	0	16	14	30
i = 393	0	19	16	25
i = 394	0	16	14	32
i = 395	0	27	25	47
i = 396	0	21	19	43
i = 397	0	15	12	42
i = 398	0	16	22	44
i = 399	0	12	12	23
i = 400	0	19	19	30
i = 401	0	17	24	46
i = 402	0	16	18	34
i = 403	0	20	16	43
i = 404	0	20	22	52
i = 405	0	19	22	42
i = 406	0	22	24	35
i = 407	0	5	4	10
i = 408	0	17	21	34
i = 409	0	12	10	22
i = 410	0	9	9	27
i = 411	0	10	12	32
i = 412	0	20	18	41
i = 413	0	23	21	39
i = 414	0	11	13	23
i = 415	0	16	15	37
i = 416	0	16	16	39
i = 417	0	11	11	22
i = 418	0	11	10	19
i = 419	0	4	3	10
i = 420	0	6	8	15
i = 421	0	9	7	14
i = 422	0	18	15	35
i = 423	0	19	16	40
i = 424	0	14	11	37
i = 425	0	30	31	53
i = 426	0	39	35	61
i = 427	0	17	16	33
i = 428	0	15	15	27
i = 429	0	16	16	38
i = 430	0	33	32	54
i = 431	0	21	14	39
i = 432	0	23	23	55
i = 433	0	27	28	48
i = 434	0	32	32	54
i = 435	0	15	14	25
i = 436	0	28	29	50
i = 437	0	31	33	60
i = 438	0	24	23	45
i = 439	0	21	23	43
i = 440	0	27	29	48
i = 441	0	34	36	48
i = 442	0	11	12	18
i = 443	0	32	31	52
i = 444	0	28	26	46
i = 445	0	26	19	46
i = 446	0	24	30	51
i = 447	0	24	26	50
i = 448	0	22	21	42
i = 449	0	17	15	30
i = 450	0	28	31	53
i = 451	0	29	32	46
i = 452	0	19	20	41
i = 453	0	23	23	41
i = 454	0	28	23	44
i = 455	0	29	40	51
i = 456	0	21	18	28
i = 457	0	31	33	50
i = 458	0	24	24	53
i = 459	0	24	25	49
i = 460	0	35	33	59
i = 461	0	28	32	55
i = 462	0	42	41	70
i = 463	0	16	18	30
i = 464	0	14	19	28
i = 465	0	21	22	44
i = 466	0	15	12	40
i = 467	0	17	27	45
i = 468	0	33	25	56
i = 469	0	34	34	67
i = 470	0	16	15	26
i = 471	0	47	48	76
i = 472	0	52	37	86
i = 473	0	45	44	72
i = 474	0	41	41	78
i = 475	0	36	34	73
i = 476	0	38	35	65
i = 477	0	21	22	41
i = 478	0	58	62	105
i = 479	0	49	43	101
i = 480	0	27	26	67
i = 481	0	31	31	79
i = 482	0	31	32	69
i = 483	0	29	25	57
i = 484	0	26	26	52
i = 485	0	21	20	58
i = 486	0	26	27	97
i = 487	0	43	29	107
i = 488	0	33	34	97
i = 489	0	60	41	153
i = 490	0	71	62	176
i = 491	0	6	4	7
i = 492	0	73	59	190
i = 493	0	67	68	210
i = 494	0	37	102	199
i = 495	0	0	0	0
i = 496	0	72	142	195
i = 497	0	31	38	63
i = 498	0	23	21	41
i = 499	0	50	40	109
i = 500	0	38	70	128
i = 501	0	35	35	75
i = 502	0	27	24	75
i = 503	0	38	46	87
i = 504	0	42	41	80
i = 505	0	19	22	40
i = 506	0	31	38	76
i = 507	0	51	49	92
i = 508	0	34	39	76
i = 509	0	24	28	65
i = 510	0	38	44	87
i = 511	0	28	29	54
i = 512	0	34	36	52
i = 513	0	36	34	72
i = 514	0	31	38	77
i = 515	0	36	42	75
i = 516	0	33	39	80
i = 517	0	31	40	73
i = 518	0	38	42	67
i = 519	0	19	22	41
i = 520	0	23	30	56
i = 521	0	29	36	77
i = 522	0	29	30	64
i = 523	0	41	52	87
i = 524	0	32	43	80
i = 525	0	42	58	76
i = 526	0	20	29	44
i = 527	0	35	49	66
i = 528	0	23	34	55
i = 529	0	23	37	53
i = 530	0	35	54	74
i = 531	0	34	62	74
i = 532	0	30	48	54
i = 533	0	13	18	19
i = 534	0	7	12	12
	9336
	Prop.Single	0.770458
