# Supplementary material
Source: publisher figshare collection journal article supplement (https://tandf.figshare.com/articles/dataset/_/6220322)
Supplement: Supplementary file 3 [file 1 › Scenarios.xlsx]

## Sheet: Scenario 1
			p*=0.3 ; phi=0.6
PSP	Bias	CI.Inf	CI.Sup	Cover	Mean	MSE	E(V(N))	RRMSE	RB(E(V(N)))	RLCI(N)
1	0.0619962352658157	264.367948759557	3.53513148122067e+28	0.869	557.548023514553	61018.7412216951	412965.011096675	0.470513749114649	5.76783891028296	6.73358377375365e+25
2	-0.0536974223751813	341.511633222263	734.096737556861	0.963	496.80885325303	7443.90257450046	10679.9917793539	0.164339150172339	0.43473019326433	0.74778115111352
3	-0.0428763982336593	361.235575063447	704.531670513223	0.956	502.489890927329	6649.83394554063	8138.03870825413	0.155326693333198	0.223795778195557	0.65389732466624
4	-0.0351180960447136	373.040411442741	691.88513028537	0.963	506.562999576525	5511.99203659442	6954.81089506685	0.141414840270987	0.261759967883386	0.607323273985961
5	-0.0434311559944609	373.44833798299	678.57987409599	0.933	502.198643102908	5882.75002501308	6373.98926799158	0.146093500020866	0.0835050343614435	0.581202925929524
6	-0.0507228444470158	373.571289168746	667.942476352131	0.943	498.370506665317	5556.80372854854	5913.98648236991	0.141988517673777	0.0642784541743506	0.560707023206447
7	-0.0445681815150492	374.148151682157	675.918365048595	0.939	501.601704704599	6127.36666493483	6264.97194958183	0.149099995847312	0.0224574914758206	0.574800406412261
8	-0.0474123884863976	363.025699132036	693.256416797942	0.91	500.108496044641	8304.03459060721	7594.3774511161	0.173574239607334	-0.0854593188103773	0.629010890792202
9	0.0616011539887934	303.530950925886	1115.72200364219	0.828	557.340605844117	61685.0688570964	55193.0244715561	0.473075790266638	-0.105244988873727	1.54703057660248	p*=0.5 ; phi=0.6
			p*=0.5 ; phi=0.6
PSP	Bias	CI.Inf	CI.Sup	Cover	Mean	MSE	E(V(N))	RRMSE	RB(E(V(N)))	RLCI(N)
1	0.209327699405917	405.790929631652	1.57875002547551e+35	0.824	634.897042188106	50742.7312473045	1751787.88455074	0.4290694725043	33.5229324770293	3.00714290566764e+32
2	0.00601032589110874	422.034173467134	669.840876028882	0.958	528.155421092832	2871.90237950195	4847.95336683682	0.102076444245714	0.688063424940496	0.472012766784283
3	0.00673659331154201	437.468211162927	640.664139820296	0.939	528.53671148856	2317.45372418445	2869.02656104589	0.0916951218505694	0.238008134145394	0.387039864109275
4	0.00963256234741625	441.682075310219	637.791894999741	0.935	530.057095232394	2574.62708994503	2662.43480282272	0.09664911104851	0.034105021741057	0.373542513694326
5	0.0071912496763997	444.734440720885	630.144821269862	0.939	528.77540608011	2393.65450175381	2375.35716163933	0.0931904543252049	-0.00764410239701508	0.353162629617099
6	0.0109961603370523	447.937649051186	630.372193098682	0.906	530.772984176952	2738.40858255471	2310.55500736572	0.0996758207077253	-0.156241686472454	0.347494369614279
7	0.0137412285098083	445.930421865923	636.66152322689	0.915	532.214144967649	2861.33401888248	2512.45118220605	0.101888454750109	-0.121930132719244	0.363297335925652
8	0.00785361508528625	433.33856425814	648.409908206031	0.923	529.123147919775	3347.82720248117	3244.51874306637	0.110210307347982	-0.030858360711757	0.409659702757888
9	0.227310118958945	450.950105355397	939.279958230808	0.798	644.337812453446	60348.9264397213	19206.9260693592	0.467924161693425	-0.681735414323504	0.930152100715067
			p*=0.3 ; phi=0.8
PSP	Bias	CI.Inf	CI.Sup	Cover	Mean	MSE	E(V(N))	RRMSE	RB(E(V(N)))	RLCI(N)
1	0.0198920121567283	640.645836924621	6.47130670533898e+31	0.886	1070.88661276456	102707.974011727	1683925.45036198	0.3052198553524	15.3952747249178	6.16314924317998e+28
2	-0.052680182037758	806.784772206477	1230.91620055788	0.94	994.685808860354	11207.0931756761	12602.9432894813	0.100822437374645	0.124550594157165	0.403934693668006
3	-0.0324590349215293	855.080070933472	1209.18945605812	0.964	1015.91801333239	6789.06182371192	8601.24961390894	0.0784721556042707	0.266927572211472	0.337247033452042
4	-0.0242690849523837	872.872220370445	1203.96753636271	0.968	1024.5174608	5578.84489913283	7447.63935883825	0.0711349195491131	0.334978744434337	0.315328872373583
5	-0.0226961181219387	878.161730156962	1200.46466600505	0.955	1026.16907597196	6687.58315311291	7072.36978641752	0.0778834710289214	0.057537472730415	0.306955176998176
6	-0.0240449881597913	877.199253620549	1198.46773248455	0.962	1024.75276243222	5589.37449263618	7015.03872079473	0.0712020184472499	0.255066864823034	0.305969979870474
7	-0.0307552938338444	861.258888285646	1204.28625221102	0.954	1017.70694147446	6953.7077165374	8038.23965318159	0.0794179947082564	0.155964556011598	0.326692727547972
8	-0.0438117872599971	823.477132939964	1226.8919158218	0.928	1003.997623377	10243.6808102703	11177.3858076251	0.0963914958013941	0.0911493646325517	0.384204555125561
9	0.0406577930263479	740.458993758653	1654.72148784574	0.834	1092.69068267767	99770.9717536306	65399.6518994465	0.300824221888711	-0.344502205902724	0.870726184844843
			p*=0.5 ; phi=0.8
PSP	Bias	CI.Inf	CI.Sup	Cover	Mean	MSE	E(V(N))	RRMSE	RB(E(V(N)))	RLCI(N)
1	7.73775486378343	4647.32262387362	19566.466199459	0.707	9174.6426069726	10446570238.2577	2577351574.71005	97.3413948681767	-0.753282511300102	14.2087081672242
2	-0.0154647826432397	921.56542691855	1161.64921100929	0.91	1033.7619782246	4019.72827872136	4193.96513213622	0.0603822162908228	0.0433454306693304	0.22865122294356
3	-0.00736297268563991	943.95917228227	1151.87029283903	0.927	1042.26887868008	2681.98590487041	3046.32908816831	0.0493218032570429	0.135848284152527	0.198010591006436
4	-0.00258063635812571	953.876072061634	1150.64497894011	0.927	1047.29033182397	2320.03148144012	2703.64860185543	0.0458730524885459	0.165349963344976	0.187398958931884
5	-0.000201355213640294	958.185975866482	1150.82109949536	0.933	1049.78857702568	2277.86238998944	2569.3479357751	0.0454542444177805	0.127964510528232	0.183462022503695
6	-0.00129957215639411	956.099269211426	1150.84074255619	0.932	1048.63544923579	2105.85671938037	2633.50670797198	0.0437043947662813	0.250563100393112	0.185468069852158
7	-0.00244821894229068	948.801276299247	1157.18526431558	0.931	1047.4293701106	2612.38822332807	3031.5050674338	0.0486776450512472	0.160434364373219	0.198460940967935
8	-0.0108146090007105	922.557611494082	1172.3477639949	0.929	1038.64466054925	4113.39013875167	4728.30624642544	0.0610816348196937	0.149491316634599	0.237895383334116
9	2.16522900442382	2385.42948446664	4728.05908186544	0.632	3323.49045464501	260810322.877462	16975568.7423201	15.3805933284779	-0.934912205333622	2.23107580704648

## Sheet: Scenario 2
			p*=0.3 ; phi=0.6
PSP	Bias	CI.Inf	CI.Sup	Cover	Mean	MSE	E(V(N))	RRMSE	RB(E(V(N)))	RLCI(N)
1	0.0561586708548532	251.475481359867	1487.04672243879	0.861	554.483302198798	61762.4758176955	108932.072080519	0.473372522350853	0.763725800145289	2.35346903062652
2	-0.0698573287102881	330.735689562545	735.18659582216	0.951	488.324902427099	8622.5145646968	11516.4237578779	0.176871420965784	0.335622418665386	0.770382678589744
3	-0.0600820178311513	351.202682628771	700.029739136592	0.948	493.456940638646	7396.16344790614	8455.97055004559	0.163811333853855	0.14329146585308	0.664432488586326
4	452.436123380682	198664.71616194	285268.323630891	0.939	238053.964774858	56434116494833.2	479239001542.259	14309.0750576757	-0.991507991418876	164.959252321811
5	-0.0530431431811413	368.801973150344	674.020115486666	0.937	497.152349829901	6795.4105437929	6444.26218502499	0.157017676475546	-0.0516743405722064	0.581367890164422
6	-0.0579723596451713	368.367133590976	667.386933784884	0.925	494.564511186285	6792.92309919464	6183.17537545552	0.15698893586324	-0.0897622002833235	0.569561524178874
7	-0.0663375340636256	364.341998513483	663.241434469571	0.892	490.172794616597	7474.29640808552	6203.66911749976	0.164674310963996	-0.169999585407294	0.569332258963978
8	-0.0638390417639422	354.071166355691	687.11496317129	0.91	491.48450307393	8462.48294389353	7715.81124205625	0.175222390019768	-0.0882331706648904	0.634369136791618
9	0.0801993080862978	304.928233679233	1166.83000675293	0.842	567.104636745306	65658.8749927897	62929.0719957504	0.488075957780559	-0.0415755371583672	1.64171766299753
			p*=0.5 ; phi=0.6
PSP	Bias	CI.Inf	CI.Sup	Cover	Mean	MSE	E(V(N))	RRMSE	RB(E(V(N)))	RLCI(N)
1	0.238248275767876	403.763608672936	5.33793707420948e+26	0.832	650.080344778135	68319.4494749095	1462247.19879328	0.49786646653804	20.4030881400807	1.01674991889704e+24
2	-0.00833148926608045	414.936501643272	659.900892111513	0.959	520.625968135308	2874.93149030731	4483.34500475282	0.102130262121588	0.559461510602323	0.466598838987127
3	-0.00155822145294256	431.508309959568	638.860878957369	0.931	524.181933737205	2946.67204733523	2987.90517158468	0.103396680996662	0.013993116161921	0.394957274281526
4	-0.00295846301175869	436.241156735725	629.735609519618	0.919	523.446806918827	2714.80489680111	2591.17416805221	0.0992453136356749	-0.0455394525384023	0.368560862445512
5	-0.00198693780445836	438.230612446734	627.897802421794	0.934	523.956857652659	2541.11644051811	2478.81444870588	0.0960180716270499	-0.0245175666958133	0.361270838047732
6	-0.00382326918865343	438.124350188685	625.631037109713	0.927	522.992783675957	2598.51160924856	2420.68181769532	0.0970963774752469	-0.0684352499793756	0.357155594135292
7	-0.00300308958802776	437.024905658636	628.54732595023	0.929	523.423377966285	2638.03847842481	2551.06717298985	0.0978320737843765	-0.0329681716723444	0.364804610079227
8	-0.00670496632286131	426.529982979256	639.908899402664	0.939	521.479892680498	3331.96349462835	3187.26269081248	0.10994888104522	-0.0434280879875041	0.406436031282681
9	0.221032489880593	445.813708072613	940.917957002616	0.777	641.042057187311	57801.0550040659	19732.6685143767	0.457939999452605	-0.658610582229189	0.943055712247625
			p*=0.3 ; phi=0.8
PSP	Bias	CI.Inf	CI.Sup	Cover	Mean	MSE	E(V(N))	RRMSE	RB(E(V(N)))	RLCI(N)
1	0.0114953381376675	629.782693964698	9.31553719346546e+38	0.895	1062.07010504455	103732.533638801	4641399.56402119	0.306738432358147	43.7439139988873	8.87194018425282e+35
2	-0.0587436391657223	798.96260503623	1231.58524378191	0.92	988.319178875992	12697.2370148273	13869.2387007872	0.107316206918699	0.0923036787130405	0.412021560710168
3	-0.0414045664363597	845.732934967201	1200.25366317731	0.943	1006.52520524182	8220.9180037167	8665.85763660754	0.0863516934944391	0.0541228647080153	0.337638788771531
4	-0.0393646896028981	859.737823051523	1184.93095524799	0.952	1008.66707591696	6442.97761517638	7192.65624149961	0.0764458672918969	0.116355925955317	0.309707744949018
5	-0.0328485071017808	868.313899574434	1189.01940713979	0.95	1015.50906754313	6277.86140233986	6994.17062336525	0.0754599586111485	0.114100833885631	0.305433816728906
6	-0.0342903597388487	865.351717295766	1189.55878742579	0.946	1013.99512227421	6234.93404546465	7140.78292963753	0.0752015224279279	0.145286041130107	0.30876863821907
7	-0.0387983228523054	853.248869680426	1195.54412734183	0.936	1009.26176100508	8144.64793019259	8017.46692063231	0.0859501935096543	-0.0156152863389971	0.325995483487053
8	-0.0586946603252805	811.672548116854	1206.65913514045	0.913	988.370606658456	12259.6526673391	10797.7088109409	0.105450776976433	-0.119248391130439	0.376177701927237
9	0.0291881219982678	723.647530221503	1654.45832745794	0.84	1080.64752809818	107365.044305047	66342.3748673883	0.312062910549512	-0.382085898657154	0.886486473558511
			p*=0.5 ; phi=0.8
PSP	Bias	CI.Inf	CI.Sup	Cover	Mean	MSE	E(V(N))	RRMSE	RB(E(V(N)))	RLCI(N)
1	0.100758215436371	841.639320256049	3.21444810700775e+24	0.847	1155.79612620819	65591.2520365438	3252471.43898564	0.243912277522303	48.5869698778359	3.06137914953119e+21
2	-0.0237321759543074	901.098795607081	1173.38875878121	0.94	1025.08121524798	4039.41925569545	6308.57221421561	0.0605299292975536	0.561752275483841	0.259323774451552
3	-0.0126894633788368	931.248206564883	1154.73178262061	0.95	1036.67606345222	2743.5937001581	3392.17104799529	0.0498850715440521	0.236397010169477	0.212841501005451
4	-0.0108480157388648	938.751477777284	1149.57222984782	0.956	1038.60958347419	2344.52100182648	2991.38694689157	0.0461145276623389	0.275905374514092	0.200781668638604
5	-0.00943214232013144	942.535276695522	1148.17526284445	0.959	1040.09625056386	2471.12302257453	2840.03661226283	0.0473432299951266	0.149289851746817	0.195847605856124
6	-0.00713518474865205	943.754314181159	1152.05605780993	0.941	1042.50805601392	2833.21392759607	2919.30251280699	0.0506932791512598	0.0303854870867315	0.198382612979783
7	-0.0107529684642858	935.420519446131	1154.04010909574	0.958	1038.7093831125	2714.27427411452	3245.30992023733	0.0496178070781266	0.195645536336248	0.20820913299963
8	-0.0169069442619702	911.200073572172	1170.98228245597	0.931	1032.24770852493	4438.43779093164	4725.34113693834	0.0634491443179278	0.0646406144506264	0.247411627508378
9	0.107229058675747	913.158915543642	1493.48860229664	0.803	1162.59051160954	69306.690347916	25797.8464605832	0.250725370076352	-0.627772638816263	0.552694939764756

## Sheet: Scenario 3
			p*=0.3 ; phi=0.6
PSP	Bias	CI.Inf	CI.Sup	Cover	Mean	MSE	E(V(N))	RRMSE	RB(E(V(N)))	RLCI(N)
1	-0.0339945154230518	209.07829498242	6.60271859784929e+25	0.863	507.152879402898	62689.7987957945	355558.492785938	0.4769129711232	4.67171213843152	1.25766068530463e+23
2	-0.181295214052595	278.299901711524	1218.69702360316	0.84	429.820012622388	15900.1717276587	17242.7872176076	0.240182634422488	0.084440313786891	1.79123261312693
3	-0.171203745517381	300.50294242682	637.512958010682	0.812	435.118033603375	13838.6337856966	7892.28318671738	0.224071852629574	-0.429692026761001	0.641923839207356
4	1.8372776224278	1199.71649338281	1866.60938326288	0.782	1489.5707517746	1105154987.17136	8139875.14734058	63.3216598528292	-0.992634630217636	1.27027217120013
5	-0.179837434322208	310.176198639061	602.035332472339	0.738	430.585346980841	14801.3077464045	5908.83035544654	0.231734524365433	-0.600789980406839	0.555922159682434
6	-0.161264573128885	318.098301336818	614.158822075873	0.751	440.336099107335	13095.12595323	6140.24316569571	0.217969403941936	-0.531104688291969	0.563924801407724
7	-0.165786521176244	316.772048904776	610.038010363798	0.735	437.962076382472	20103.5189955499	6042.68561633868	0.270070245304477	-0.699421498411482	0.558601831350517
8	-0.175129440216513	302.230516017245	626.045071360031	0.769	433.057043886331	15264.8809138582	7261.82449431454	0.235335479467258	-0.524278994687609	0.616789629224353
9	-0.0319701841442168	249.632005831125	1216.65962576005	0.831	508.215653324286	64784.429427013	78670.2866985375	0.484814963611421	0.214339423752562	1.8419573712932
			p*=0.5 ; phi=0.6
PSP	Bias	CI.Inf	CI.Sup	Cover	Mean	MSE	E(V(N))	RRMSE	RB(E(V(N)))	RLCI(N)
1	0.147514095471147	368.002586367499	1.08482056169195e+36	0.861	602.444900122352	53902.6599882616	1121674.84547933	0.442227550370415	19.8092670328997	2.06632487941324e+33
2	-0.104977997575605	369.393354673939	606.039980507859	0.847	469.886551272807	6458.35957033614	4262.89494435466	0.153074132534227	-0.339941528815684	0.450755477778896
3	-0.109715114884164	379.074711990839	578.630518141297	0.775	467.399564685814	6430.75732660372	2764.58863681787	0.152746672160668	-0.570099057325502	0.380106297429445
4	-0.110345794350891	382.30530505502	572.446271413759	0.751	467.068457965782	6234.21481583191	2495.58638652657	0.150394369748331	-0.59969515644713	0.362173269254742
5	-0.113672528330182	384.035260022618	565.468879707961	0.724	465.321922626655	6286.96775989003	2274.04594106937	0.151029336068668	-0.638292094389689	0.345587847019702
6	-0.109671842845995	386.292351395874	567.102939618157	0.715	467.422282505852	6502.232572505	2252.08999760366	0.153593184992722	-0.653643579725718	0.344401120423396
7	-0.108963007263513	386.22646788174	568.279397759539	0.733	467.794421186655	6446.56414848555	2295.27086550246	0.152934282846551	-0.643954389868024	0.346767485481523
8	-0.102869043704372	379.76650591595	586.878422698994	0.754	470.993752055205	7178.84065676154	3027.71064694303	0.1613867416715	-0.578245180286691	0.39449888911056
9	0.16992055039729	409.479159979928	944.963488807602	0.816	614.208288958577	66490.0805124597	23368.9418591778	0.491155629306435	-0.648534914094463	1.01997015014795
			p*=0.3 ; phi=0.8
PSP	Bias	CI.Inf	CI.Sup	Cover	Mean	MSE	E(V(N))	RRMSE	RB(E(V(N)))	RLCI(N)
1	-0.0336845130594242	590.746209600134	1895.94655207976	0.878	1014.6312612876	101635.717839734	124930.371370881	0.303622450001451	0.229197510740062	1.24304794521869
2	-0.122363846644102	742.092945571176	1149.45468864114	0.784	921.517961023693	24839.1416951172	11697.783542766	0.150099412847179	-0.529058464002179	0.387963564828533
3	-0.101113125387177	787.896630940685	1132.92069637814	0.793	943.831218343464	16921.846750259	8164.59901802625	0.123889522690317	-0.517511348582489	0.328594348035671
4	-0.0958461245221006	803.738735746274	1123.10148739822	0.773	949.361569251795	15523.2134559464	6995.59658138889	0.118659227222075	-0.549346106639465	0.30415500157328
5	-0.0917793691194685	812.102849111512	1121.19470411729	0.789	953.631662424558	13828.098850631	6487.15361227526	0.111993273407621	-0.53087162000008	0.294373195243601
6	-0.100093443698377	803.413062475794	1112.72627665671	0.741	944.901884116704	16438.9047905638	6514.0440395961	0.122108849960216	-0.603742212599512	0.294584013505638
7	-0.0969345690184543	797.810852908259	1128.84279311454	0.786	948.218702530623	15696.2519861589	7507.2962900515	0.119318746443096	-0.521714082019612	0.315268514482176
8	-0.109510161921706	762.042272153721	1150.24940171554	0.759	935.014329982209	22886.6015464665	10453.8261958107	0.144079222181301	-0.543233792287317	0.369721075773165
9	-0.00420274602814296	685.398757912463	1646.47220344417	0.831	1045.58711667045	120780.142535743	73716.402551447	0.330985120046633	-0.389664550779682	0.915308043363533
			p*=0.5 ; phi=0.8
PSP	Bias	CI.Inf	CI.Sup	Cover	Mean	MSE	E(V(N))	RRMSE	RB(E(V(N)))	RLCI(N)
1	0.067173791088217	811.897501469459	5.4265151235952e+27	0.852	1120.53248064263	72579.7791548168	1450457.95255142	0.256577472186071	18.9843257921398	5.16810964151923e+24
2	-0.0804135270005444	847.141852388282	1103.55741985535	0.747	965.565796649429	11021.5085080051	4913.68657789504	0.0999841643153394	-0.554172954244315	0.244205302349584
3	-0.0718065250171527	874.177141963567	1087.26720027044	0.743	974.60314873199	8308.27465405889	3090.88075438636	0.0868092738499595	-0.627975616709258	0.202942912673217
4	-0.0679399586728057	882.991647023786	1085.19708159412	0.736	978.663043393554	7448.51866115278	2756.32698634751	0.0821950484914417	-0.629949643447503	0.192576604352702
5	-0.066821816916069	885.367561468005	1084.83154194827	0.742	979.837092238128	7278.92531093341	2675.76760346972	0.0812539219269508	-0.632395238422004	0.189965695695486
6	-0.067284416960972	884.503641547313	1084.84623761239	0.752	979.35136219098	7362.45407053262	2704.2659906067	0.0817188036853609	-0.632695027405302	0.190802472442931
7	-0.067963454905278	879.52471403386	1089.57906868219	0.751	978.638372349458	7791.53830320776	2999.25694613606	0.0840663721326456	-0.615062285594968	0.200051766331739
8	-0.0735726744001048	855.012103300795	1108.63563092964	0.768	972.74869187989	10178.9579232438	4582.64704572559	0.0960864969512692	-0.549792122112909	0.241546216789378
9	0.0675717883800789	872.49058501106	1454.29647875753	0.85	1120.95037779908	58833.9535179953	25958.065905534	0.231006775171319	-0.558791066155459	0.554100851187114
